# Supplementary figures and images for: PKR activation-induced mitochondrial dysfunction in HIV-transgenic mice with nephropathy
Source: eLife journal article supplement (doi:10.7554/elife.91260), 2023-11-07

Raw blot images for Figure3D

|      |      |     |      |
|------|------|-----|------|
| WT   | Tg26 | WT  | Tg26 |
| Cont |      | C16 |      |

IB:OXPHOS

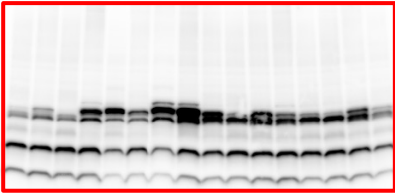

IB:VDAC

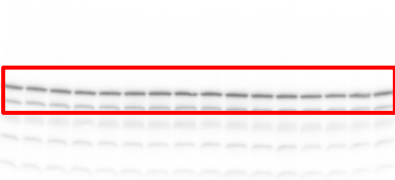

Supplement: fig3-data1 [file elife-91260-fig3-data1-v2.zip]

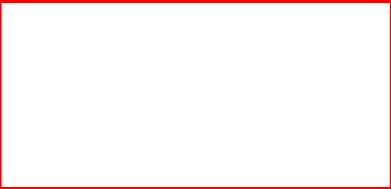

Supplement: fig3-data2 [file elife-91260-fig3-data2-v2.zip]

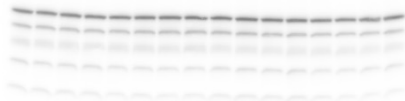

Supplement: fig3-data2 [file elife-91260-fig3-data2-v2.zip]

Raw blot images for Figure 5C

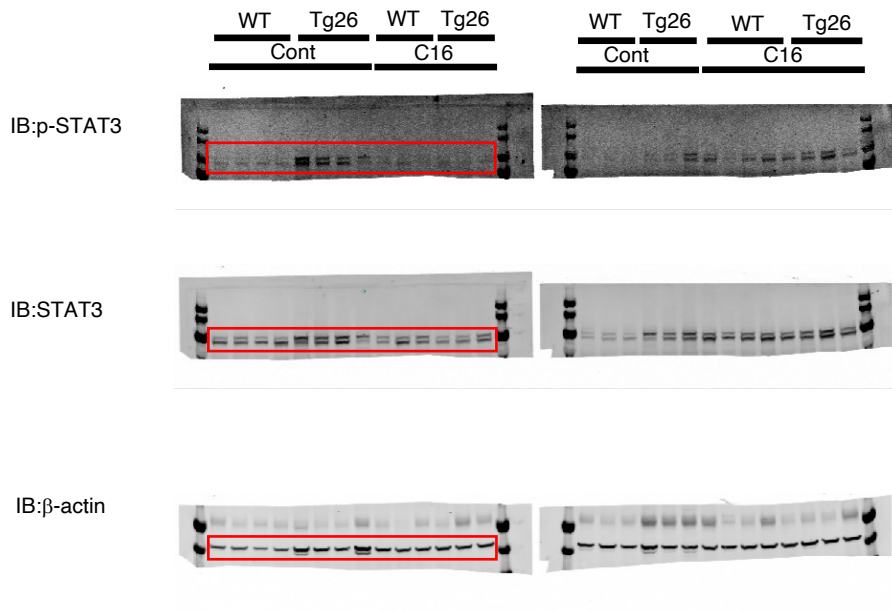

Supplement: fig6-data1 [file elife-91260-fig6-data1-v2.zip]

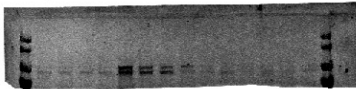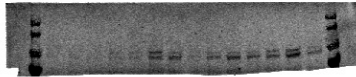

Supplement: fig6-data2 [file elife-91260-fig6-data2-v2.zip]

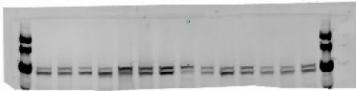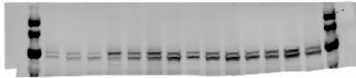

Supplement: fig6-data2 [file elife-91260-fig6-data2-v2.zip]
